# Supplementary material for: A biomechanical analysis of prognathous and orthognathous insect head capsules: evidence for a many‐to‐one mapping of form to function
Source: Oxford University Press journal article supplement (doi:10.1111/jeb.13251), 2018-02-14
Supplement: jeb13251-sup-0002-tables1.pdf [file jeb13251-sup-0002-tables1.pdf]

sheet 1

| No. | First head region                                      | Second head region                                     | Strain type | Ratio of IQR ranges of strain for each head region pair |              |               |                   |
|-----|--------------------------------------------------------|--------------------------------------------------------|-------------|---------------------------------------------------------|--------------|---------------|-------------------|
|     |                                                        |                                                        |             | <i>Forficula</i>                                        | <i>Perla</i> | <i>Lestes</i> | <i>Siphonurus</i> |
| 1   | Anterior tentorial arm                                 | Eye                                                    | ε3          | 2.47                                                    | 1.73         | 5.42          | 1.52              |
| 2   | Anterior tentorial arm                                 | Head excl. tentorium, eye, and muscle attachment sites | ε3          | 2.17                                                    | 1.19         | 1.66          | 3.45              |
| 3   | Anterior tentorial arm                                 | Whole tentorium                                        | ε3          | 3.94                                                    | 1.31         | 1.55          | 2.22              |
| 4   | Anterior tentorial arm                                 | Complete head                                          | ε3          | 2.39                                                    | 1.05         | 1.96          | 0.95              |
| 5   | Anterior tentorial arm                                 | Corpotalentorium                                       | ε3          | 2.15                                                    | 2.72         | 1.55          | 1.16              |
| 6   | Anterior tentorial arm                                 | Dorsal tentorial arm                                   | ε3          | 2.25                                                    | 2.55         | 0.55          | 1.06              |
| 7   | Anterior tentorial arm                                 | Epistomal area/ridge                                   | ε3          | 4.23                                                    | 2.09         | 1.55          | 2.73              |
| 8   | Anterior tentorial arm                                 | Genal/subgenal area/ridge                              | ε3          | 1.22                                                    | 0.17         | 1.86          | 1.43              |
| 9   | Anterior tentorial arm                                 | Head excl. eye                                         | ε3          | 2.41                                                    | 1.13         | 1.65          | 0.26              |
| 10  | Eye                                                    | Whole tentorium                                        | ε3          | 1.60                                                    | 0.75         | 0.29          | 1.46              |
| 11  | Eye                                                    | Complete head                                          | ε3          | 0.97                                                    | 0.60         | 0.36          | 0.62              |
| 12  | Eye                                                    | Corpotalentorium                                       | ε3          | 0.87                                                    | 1.57         | 0.28          | 0.76              |
| 13  | Eye                                                    | Dorsal tentorial arm                                   | ε3          | 0.91                                                    | 1.47         | 0.10          | 0.70              |
| 14  | Eye                                                    | Epistomal area/ridge                                   | ε3          | 1.72                                                    | 1.21         | 0.29          | 1.79              |
| 15  | Eye                                                    | Genal/subgenal area/ridge                              | ε3          | 0.50                                                    | 0.10         | 0.34          | 0.94              |
| 16  | Eye                                                    | Head excl. eye                                         | ε3          | 0.98                                                    | 0.65         | 0.30          | 0.17              |
| 17  | Head excl. tentorium, eye, and muscle attachment sites | Eye                                                    | ε3          | 1.14                                                    | 1.46         | 3.26          | 0.44              |
| 18  | Head excl. tentorium, eye, and muscle attachment sites | Whole tentorium                                        | ε3          | 1.82                                                    | 1.10         | 0.93          | 0.64              |
| 19  | Head excl. tentorium, eye, and muscle attachment sites | Complete head                                          | ε3          | 1.10                                                    | 0.88         | 1.18          | 0.27              |
| 20  | Head excl. tentorium, eye, and muscle attachment sites | Corpotalentorium                                       | ε3          | 0.99                                                    | 2.29         | 0.93          | 0.34              |
| 21  | Head excl. tentorium, eye, and muscle attachment sites | Dorsal tentorial arm                                   | ε3          | 1.04                                                    | 2.15         | 0.33          | 0.31              |
| 22  | Head excl. tentorium, eye, and muscle attachment sites | Epistomal area/ridge                                   | ε3          | 1.95                                                    | 1.76         | 0.93          | 0.79              |
| 23  | Head excl. tentorium, eye, and muscle attachment sites | Genal/subgenal area/ridge                              | ε3          | 0.56                                                    | 0.14         | 1.12          | 0.41              |
| 24  | Head excl. tentorium, eye, and muscle attachment sites | Head excl. eye                                         | ε3          | 1.11                                                    | 0.95         | 0.99          | 0.08              |
| 25  | Whole tentorium                                        | Complete head                                          | ε3          | 0.61                                                    | 0.80         | 1.27          | 0.43              |
| 26  | Whole tentorium                                        | Corpotalentorium                                       | ε3          | 0.54                                                    | 2.08         | 1.00          | 0.52              |
| 27  | Whole tentorium                                        | Dorsal tentorial arm                                   | ε3          | 0.57                                                    | 1.96         | 0.35          | 0.48              |
| 28  | Whole tentorium                                        | Epistomal area/ridge                                   | ε3          | 1.07                                                    | 1.60         | 1.00          | 1.23              |
| 29  | Whole tentorium                                        | Genal/subgenal area/ridge                              | ε3          | 0.31                                                    | 0.13         | 1.20          | 0.64              |
| 30  | Whole tentorium                                        | Head excl. eye                                         | ε3          | 0.61                                                    | 0.86         | 1.07          | 0.12              |
| 31  | Complete head                                          | Head excl. eye                                         | ε3          | 1.01                                                    | 1.08         | 0.84          | 0.28              |
| 32  | Corpotalentorium                                       | Complete head                                          | ε3          | 1.11                                                    | 0.39         | 1.27          | 0.82              |

## sheet 1

## Ratio of IQR ranges of strain for each head region pair

| No. | First head region                                      | Second head region                                     | Strain type | Ratio of IQR ranges of strain for each head region pair |              |               |                   |
|-----|--------------------------------------------------------|--------------------------------------------------------|-------------|---------------------------------------------------------|--------------|---------------|-------------------|
|     |                                                        |                                                        |             | <i>Forficula</i>                                        | <i>Perla</i> | <i>Lestes</i> | <i>Siphonurus</i> |
| 33  | Corpotentorium                                         | Dorsal tentorial arm                                   | ε3          | 1.05                                                    | 0.94         | 0.35          | 0.91              |
| 34  | Corpotentorium                                         | Epistomal area/ridge                                   | ε3          | 1.97                                                    | 0.77         | 1.00          | 2.35              |
| 35  | Corpotentorium                                         | Genal/subgenal area/ridge                              | ε3          | 0.57                                                    | 0.06         | 1.20          | 1.23              |
| 36  | Corpotentorium                                         | Head excl. eye                                         | ε3          | 1.12                                                    | 0.41         | 1.07          | 0.23              |
| 37  | Dorsal tentorial arm                                   | Complete head                                          | ε3          | 1.06                                                    | 0.41         | 3.59          | 0.89              |
| 38  | Dorsal tentorial arm                                   | Epistomal area/ridge                                   | ε3          | 1.88                                                    | 0.82         | 2.83          | 2.58              |
| 39  | Dorsal tentorial arm                                   | Genal/subgenal area/ridge                              | ε3          | 0.54                                                    | 0.06         | 3.40          | 1.35              |
| 40  | Dorsal tentorial arm                                   | Head excl. eye                                         | ε3          | 1.07                                                    | 0.44         | 3.02          | 0.25              |
| 41  | Epistomal area/ridge                                   | Complete head                                          | ε3          | 0.56                                                    | 0.50         | 1.27          | 0.35              |
| 42  | Epistomal area/ridge                                   | Genal/subgenal area/ridge                              | ε3          | 0.29                                                    | 0.08         | 1.20          | 0.52              |
| 43  | Epistomal area/ridge                                   | Head excl. eye                                         | ε3          | 0.57                                                    | 0.54         | 1.07          | 0.10              |
| 44  | Genal/subgenal area/ridge                              | Complete head                                          | ε3          | 1.95                                                    | 6.34         | 1.06          | 0.66              |
| 45  | Genal/subgenal area/ridge                              | Head excl. eye                                         | ε3          | 1.97                                                    | 6.82         | 0.89          | 0.18              |
| 46  | Anterior tentorial arm                                 | Eye                                                    | ε1          | 3.94                                                    | 1.86         | 5.94          | 1.59              |
| 47  | Anterior tentorial arm                                 | Head excl. tentorium, eye, and muscle attachment sites | ε1          | 2.91                                                    | 1.14         | 1.77          | 3.62              |
| 48  | Anterior tentorial arm                                 | Whole tentorium                                        | ε1          | 2.62                                                    | 2.28         | 2.27          | 2.77              |
| 49  | Anterior tentorial arm                                 | Complete head                                          | ε1          | 3.35                                                    | 1.18         | 2.14          | 0.97              |
| 50  | Anterior tentorial arm                                 | Corpotentorium                                         | ε1          | 3.19                                                    | 1.11         | 0.91          | 1.24              |
| 51  | Anterior tentorial arm                                 | Dorsal tentorial arm                                   | ε1          | 1.69                                                    | 2.81         | 0.33          | 1.21              |
| 52  | Anterior tentorial arm                                 | Epistomal area/ridge                                   | ε1          | 3.91                                                    | 1.71         | 0.91          | 3.24              |
| 53  | Anterior tentorial arm                                 | Genal/subgenal area/ridge                              | ε1          | 1.58                                                    | 0.20         | 2.08          | 1.46              |
| 54  | Anterior tentorial arm                                 | Head excl. eye                                         | ε1          | 3.50                                                    | 1.29         | 1.75          | 0.29              |
| 55  | Eye                                                    | Whole tentorium                                        | ε1          | 0.67                                                    | 1.23         | 0.38          | 1.74              |
| 56  | Eye                                                    | Complete head                                          | ε1          | 0.85                                                    | 0.63         | 0.36          | 0.61              |
| 57  | Eye                                                    | Corpotentorium                                         | ε1          | 0.81                                                    | 0.60         | 0.15          | 0.78              |
| 58  | Eye                                                    | Dorsal tentorial arm                                   | ε1          | 0.43                                                    | 1.51         | 0.05          | 0.76              |
| 59  | Eye                                                    | Epistomal area/ridge                                   | ε1          | 0.99                                                    | 0.92         | 0.15          | 2.03              |
| 60  | Eye                                                    | Genal/subgenal area/ridge                              | ε1          | 0.40                                                    | 0.11         | 0.35          | 0.92              |
| 61  | Eye                                                    | Head excl. eye                                         | ε1          | 0.89                                                    | 0.69         | 0.30          | 0.18              |
| 62  | Head excl. tentorium, eye, and muscle attachment sites | Eye                                                    | ε1          | 1.35                                                    | 1.63         | 3.36          | 0.44              |
| 63  | Head excl. tentorium, eye, and muscle attachment sites | Whole tentorium                                        | ε1          | 0.90                                                    | 2.00         | 1.28          | 0.76              |
| 64  | Head excl. tentorium, eye, and muscle attachment sites | Complete head                                          | ε1          | 1.15                                                    | 1.04         | 1.21          | 0.27              |

sheet 1

| No. | First head region                                      | Second head region        | Strain type | Ratio of IQR ranges of strain for each head region pair |              |               |                   |
|-----|--------------------------------------------------------|---------------------------|-------------|---------------------------------------------------------|--------------|---------------|-------------------|
|     |                                                        |                           |             | <i>Forficula</i>                                        | <i>Perla</i> | <i>Lestes</i> | <i>Siphonurus</i> |
| 65  | Head excl. tentorium, eye, and muscle attachment sites | Corpotentorium            | ε1          | 1.10                                                    | 0.97         | 0.52          | 0.34              |
| 66  | Head excl. tentorium, eye, and muscle attachment sites | Dorsal tentorial arm      | ε1          | 0.58                                                    | 2.47         | 0.18          | 0.33              |
| 67  | Head excl. tentorium, eye, and muscle attachment sites | Epistomal area/ridge      | ε1          | 1.34                                                    | 1.50         | 0.52          | 0.89              |
| 68  | Head excl. tentorium, eye, and muscle attachment sites | Genal/subgenal area/ridge | ε1          | 0.54                                                    | 0.18         | 1.18          | 0.40              |
| 69  | Head excl. tentorium, eye, and muscle attachment sites | Head excl. eye            | ε1          | 1.20                                                    | 1.13         | 0.99          | 0.08              |
| 70  | Whole tentorium                                        | Complete head             | ε1          | 1.28                                                    | 0.52         | 0.94          | 0.35              |
| 71  | Whole tentorium                                        | Corpotentorium            | ε1          | 1.22                                                    | 0.49         | 0.40          | 0.45              |
| 72  | Whole tentorium                                        | Dorsal tentorial arm      | ε1          | 0.64                                                    | 1.23         | 0.14          | 0.44              |
| 73  | Whole tentorium                                        | Epistomal area/ridge      | ε1          | 1.49                                                    | 0.75         | 0.40          | 1.17              |
| 74  | Whole tentorium                                        | Genal/subgenal area/ridge | ε1          | 0.60                                                    | 0.09         | 0.92          | 0.53              |
| 75  | Whole tentorium                                        | Head excl. eye            | ε1          | 1.34                                                    | 0.56         | 0.77          | 0.11              |
| 76  | Complete head                                          | Head excl. eye            | ε1          | 1.05                                                    | 1.09         | 0.82          | 0.30              |
| 77  | Corpotentorium                                         | Complete head             | ε1          | 1.05                                                    | 1.06         | 2.34          | 0.78              |
| 78  | Corpotentorium                                         | Dorsal tentorial arm      | ε1          | 0.53                                                    | 2.54         | 0.36          | 0.98              |
| 79  | Corpotentorium                                         | Epistomal area/ridge      | ε1          | 1.22                                                    | 1.54         | 1.00          | 2.62              |
| 80  | Corpotentorium                                         | Genal/subgenal area/ridge | ε1          | 0.49                                                    | 0.18         | 2.29          | 1.18              |
| 81  | Corpotentorium                                         | Head excl. eye            | ε1          | 1.10                                                    | 1.16         | 1.92          | 0.23              |
| 82  | Dorsal tentorial arm                                   | Complete head             | ε1          | 1.98                                                    | 0.42         | 6.58          | 0.80              |
| 83  | Dorsal tentorial arm                                   | Epistomal area/ridge      | ε1          | 2.31                                                    | 0.61         | 2.81          | 2.68              |
| 84  | Dorsal tentorial arm                                   | Genal/subgenal area/ridge | ε1          | 0.93                                                    | 0.07         | 6.41          | 1.21              |
| 85  | Dorsal tentorial arm                                   | Head excl. eye            | ε1          | 2.07                                                    | 0.46         | 5.39          | 0.24              |
| 86  | Epistomal area/ridge                                   | Complete head             | ε1          | 0.86                                                    | 0.69         | 2.34          | 0.30              |
| 87  | Epistomal area/ridge                                   | Genal/subgenal area/ridge | ε1          | 0.40                                                    | 0.12         | 2.28          | 0.45              |
| 88  | Epistomal area/ridge                                   | Head excl. eye            | ε1          | 0.90                                                    | 0.75         | 1.92          | 0.09              |
| 89  | Genal/subgenal area/ridge                              | Complete head             | ε1          | 2.13                                                    | 5.88         | 1.03          | 0.66              |
| 90  | Genal/subgenal area/ridge                              | Head excl. eye            | ε1          | 2.22                                                    | 6.42         | 0.84          | 0.20              |
